# Supplementary material for: Nitric Oxide Inhibits Hetero-adhesion of Cancer Cells to Endothelial Cells: Restraining Circulating Tumor Cells from Initiating Metastatic Cascade
Source: PubMed Central journal article supplement — Sci Rep. 2014 Mar 11;4:4344. doi: 10.1038/srep04344 (PMC3949248; doi:10.1038/srep04344), 2014-03-11
Supplement: srep04344-s1.pdf [file srep04344-s1.pdf]

# **Nitric Oxide Inhibits Hetero-adhesion of Cancer Cells to Endothelial Cells: Restraining Circulating Tumor Cells from Initiating Metastatic Cascade**

Yusheng Lu<sup>1</sup>, Ting Yu<sup>1</sup>, Haiyan Liang<sup>1</sup>, Jichuang Wang<sup>1</sup>, Jingjing Xie<sup>1</sup>, Jingwei Shao<sup>1\*</sup>,  
Yu Gao<sup>1</sup>, Suhong Yu<sup>1</sup>, Shuming Chen<sup>2</sup>, Lie Wang<sup>2</sup>, Lee Jia<sup>1\*</sup>

<sup>1</sup> Cancer Metastasis Alert and Prevention Center, College of Chemistry and Chemical Engineering, Fuzhou University, Fuzhou 350002, China.

<sup>2</sup> Surgery Department, Fuzhou General Hospital, Fuzhou, 350025, China.

\*Correspondence should be addressed to Lee Jia, CMAPC, Fuzhou University, 523 Industry Road, Science Building, 3FL. Fuzhou, Fujian 350002, China. Phone: 086-591-8357-6912. Email: [pharmlink@gmail.com](mailto:pharmlink@gmail.com) or [shaojingwei@fzu.edu.cn](mailto:shaojingwei@fzu.edu.cn)

**Supplementary Table S1.** Percent changes in E-selectin, ICAM-1 and VCAM-1 expression by HUVECs stimulated by various cytokines in comparison with isotype controls.

|       | Untreated   | ECGS<br>(100 µg/mL) | Fibronectin<br>(100 ng/mL) | IL-6<br>(10 ng/mL) | IFN-γ<br>(10 ng/mL) | IL-1β<br>(1 ng/mL) | TNF-β<br>(10 ng/mL) | TNF-α<br>(10 ng/mL) |
|-------|-------------|---------------------|----------------------------|--------------------|---------------------|--------------------|---------------------|---------------------|
| CD62E | 1.3 ± 0.3%  | 0.7 ± 0.3%          | 1.3 ± 0.4%                 | 2.9 ± 0.3%         | 1.1 ± 0.1%          | 64.2 ± 3.3%        | 29.0 ± 2.0%         | 75.2 ± 3.6%         |
| CD54  | 66.0 ± 1.8% | 80.6 ± 1.4%         | 78.1 ± 1.4%                | 80.7 ± 1.0%        | 93.5 ± 1.0%         | 99.4 ± 0.2%        | 99.5 ± 0.2%         | 99.5 ± 0.2%         |
| CD106 | 15.3 ± 1.2% | 15.4 ± 1.2%         | 35.2 ± 1.5%                | 33.4 ± 1.8%        | 37.0 ± 1.6%         | 92.8 ± 1.8%        | 74.9 ± 1.2%         | 93.7 ± 0.9%         |

Values are mean ± SEM (n=3).
